# Supplementary material for: Surface immobilized azomethine for multiple component exchange
Source: Royal Society of Chemistry journal article supplement (doi:10.1039/c7sm01456b), 2017-01-01
Supplement: c7sm01456b1.pdf [file c7sm01456b1.pdf]

### **Electronic Supporting Information**

#### **Surface immobilized Azomethine for Multiple Component Exchange**

Michael Lerond,<sup>1</sup> Daniel Bélanger,<sup>2\*</sup> W. G. Skene<sup>1\*</sup>

<sup>1</sup>Laboratoire de caractérisation photophysique des matériaux conjugués  
Département de Chimie, Pavillon JA Bombardier  
Université de Montréal, CP 6128, succ. Centre-ville  
Montréal, Québec, Canada H3C 3J7

<sup>2</sup>Département de Chimie, Université du Québec à Montréal,  
Case Postale 8888, succursale Centre-Ville, Montréal,  
Québec H3C3P8, Canada

## Table of Contents

|                                                                                                                                                                                                                                                                                                                                                                                                                                                                                                                            |    |
|----------------------------------------------------------------------------------------------------------------------------------------------------------------------------------------------------------------------------------------------------------------------------------------------------------------------------------------------------------------------------------------------------------------------------------------------------------------------------------------------------------------------------|----|
| Figure S1. Component exchange of <b>2</b> monitored by $^1\text{H}$ NMR in DMSO- $d_6$ at 40° C: <b>2</b> (A), <b>2</b> with equimolar 4-aminodinitrotriphenylamine after 6 hrs (B), with the addition of a catalytic amount of Sc(Otf) $_3$ after 6 hrs (C), after 8 additional hours (D), and after 24 hrs (E). Inset: sample (E) after the addition of 10 equivalents of 4-aminodinitrotriphenylamine. The imine proton of <b>2</b> (○) and <b>1</b> (△) are highlighted to illustrate dynamic component exchange. .... | 3  |
| Figure S3. Square wave voltammograms of <b>1</b> (■), <b>3</b> (◆) and a mixture of <b>1</b> and <b>3</b> (►) in degassed acetonitrile with 0.1 M TBAPF $_6$ as the electrolyte.....                                                                                                                                                                                                                                                                                                                                       | 5  |
| Figure S4. AFM micrograph illustrating the surface roughness of native ITO coated glass substrate (top) and <b>1s</b> (bottom). ....                                                                                                                                                                                                                                                                                                                                                                                       | 6  |
| Figure S5. Particle size distribution of <b>1s</b> on an ITO coated glass substrate. ....                                                                                                                                                                                                                                                                                                                                                                                                                                  | 7  |
| Figure S6. Cyclic voltammograms of a glassy carbon electrode before (black) and after immobilizing <b>4s</b> (red) in 5 mM solution of K $_3$ [Fe(CN) $_6$ ] and 5 mM K $_4$ [Fe(CN) $_6$ ] with 0.1 M KCl at pH=5 at 100 mV/s. ....                                                                                                                                                                                                                                                                                       | 7  |
| Table S1. ToF-SIMS data. ....                                                                                                                                                                                                                                                                                                                                                                                                                                                                                              | 8  |
| Table S2. XPS data expressed in atomic percentages.....                                                                                                                                                                                                                                                                                                                                                                                                                                                                    | 9  |
| Figure S7. XPS survey spectrum of <b>4s</b> . ....                                                                                                                                                                                                                                                                                                                                                                                                                                                                         | 10 |
| Figure S8. XPS survey spectrum of <b>3s</b> . ....                                                                                                                                                                                                                                                                                                                                                                                                                                                                         | 10 |
| Figure S9. XPS survey spectrum of <b>2s</b> prepared by component exchange of <b>1s</b> .....                                                                                                                                                                                                                                                                                                                                                                                                                              | 10 |
| Figure S10. XPS survey spectrum of <b>3s</b> prepared by component exchange of <b>1s</b> .....                                                                                                                                                                                                                                                                                                                                                                                                                             | 11 |
| Figure S11. Synthetic scheme for the preparation of the reactive intermediate leading to <b>4s</b> : i) ethylene glycol, <i>p</i> -toluene sulfonic acid, anhydrous toluene, 120°C, overnight, and ii) PtO $_2$ , MgSO $_4$ , THF/EtOH, H $_2$ 70 psi.....                                                                                                                                                                                                                                                                 | 11 |
| Figure S12. $^1\text{H}$ -NMR spectrum of 1,3-dioxolane-4-benzenamine ( <b>7</b> ) recorded in acetone- $d_6$ ....                                                                                                                                                                                                                                                                                                                                                                                                         | 12 |
| Figure S13. $^{13}\text{C}$ -NMR spectrum of 1,3-dioxolane-4-benzenamine ( <b>7</b> ) recorded in acetone- $d_6$ ....                                                                                                                                                                                                                                                                                                                                                                                                      | 13 |
| Figure S14. $^1\text{H}$ -NMR spectrum of <i>N</i> -phenyl-1-( <i>p</i> -tolyl)methanimine ( <b>2</b> ) recorded in acetone- $d_6$ . ....                                                                                                                                                                                                                                                                                                                                                                                  | 14 |
| Figure S15. $^{13}\text{C}$ -NMR spectrum of <i>N</i> -phenyl-1-( <i>p</i> -tolyl)methanimine ( <b>2</b> ) recorded in acetone- $d_6$ . ....                                                                                                                                                                                                                                                                                                                                                                               | 15 |
| Figure S16. $^1\text{H}$ -NMR spectrum of 1,3-dioxolane-4-nitrobenzaldehyde ( <b>6</b> ) recorded in acetone- $d_6$ . ....                                                                                                                                                                                                                                                                                                                                                                                                 | 16 |
| Figure S17. $^{13}\text{C}$ -NMR spectrum of 1,3-dioxolane-4-nitrobenzaldehyde ( <b>6</b> ) recorded in acetone- $d_6$ . ....                                                                                                                                                                                                                                                                                                                                                                                              | 17 |
| Figure S18. $^1\text{H}$ -NMR spectrum of <i>N</i> -dinitrotriphenylamine-1-( <i>p</i> -tolyl)methanimine ( <b>1</b> ) recorded recorded in acetone- $d_6$ .....                                                                                                                                                                                                                                                                                                                                                           | 18 |
| Figure S19. $^{13}\text{C}$ -NMR spectrum of <i>N</i> -dinitrotriphenylamine-1-( <i>p</i> -tolyl)methanimine ( <b>1</b> ) recorded in acetone- $d_6$ .....                                                                                                                                                                                                                                                                                                                                                                 | 19 |
| Figure S20. $^1\text{H}$ -NMR spectrum of <i>N</i> -ferrocene-1-( <i>p</i> -tolyl)methanimine ( <b>3</b> ) recorded in acetone- $d_6$ . ....                                                                                                                                                                                                                                                                                                                                                                               | 20 |
| Figure S21. $^{13}\text{C}$ -NMR spectrum of <i>N</i> -ferrocene-1-( <i>p</i> -tolyl)methanimine ( <b>3</b> ) recorded in acetone- $d_6$ . ....                                                                                                                                                                                                                                                                                                                                                                            | 21 |
| Figure S22. $^1\text{H}$ -NMR spectrum of <i>N,N</i> -bis(4-nitrophenyl)-1,4-phenylenediamine recorded in acetone- $d_6$ .....                                                                                                                                                                                                                                                                                                                                                                                             | 22 |
| Figure S23. $^{13}\text{C}$ -NMR spectrum of <i>N,N</i> -bis(4-nitrophenyl)-1,4-phenylenediamine recorded in acetone- $d_6$ .....                                                                                                                                                                                                                                                                                                                                                                                          | 23 |

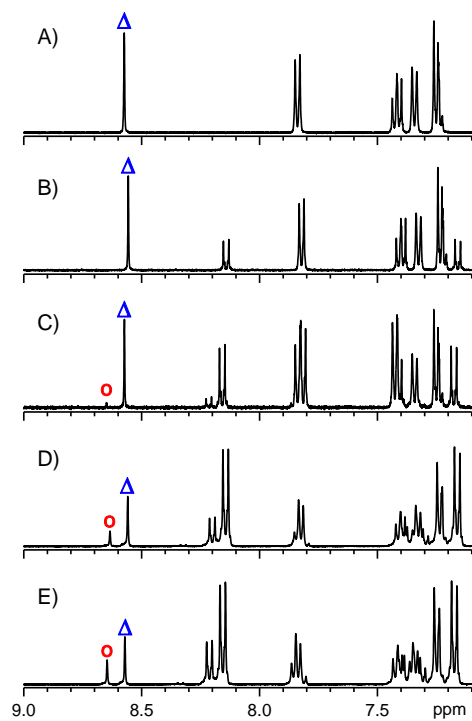

Figure S1. Component exchange of **2** monitored by  $^1\text{H}$  NMR in  $\text{DMSO-d}_6$  at  $40^\circ\text{C}$ : **2** (A), **2** with equimolar 4-aminodinitrotriphenylamine after 6 hrs (B), with the addition of a catalytic amount of  $\text{Sc}(\text{Otf})_3$  after 6 hrs (C), after 8 additional hours (D), and after 24 hrs (E). Inset: sample (E) after the addition of 10 equivalents of 4-aminodinitrotriphenylamine. The imine proton of **2** ( $\circ$ ) and **1** ( $\triangle$ ) are highlighted to illustrate dynamic component exchange.

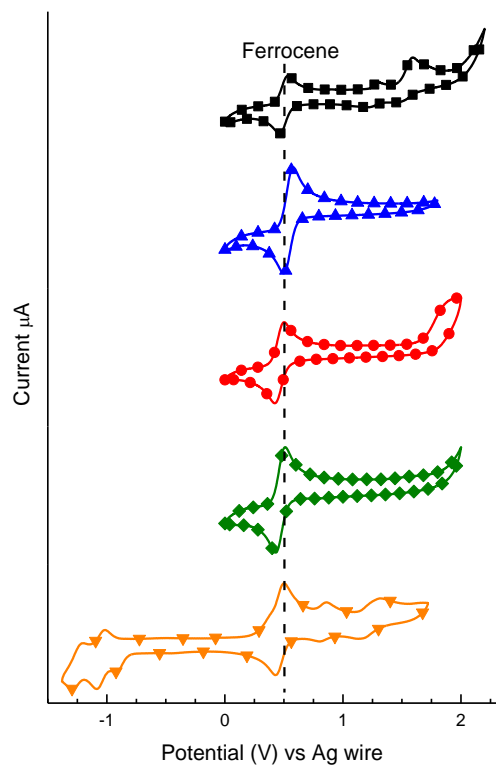

Figure S2. Cyclic voltammograms of **1** (■), **2** (●), **3** (◆), **4** (▲) and *N,N*-bis(4-nitrophenyl)-1,4-phenylenediamine (▼) in degassed acetonitrile with TBAPF<sub>6</sub> (0.1 M) as the electrolyte and ferrocene (0.1 mM) as internal reference measured at 100 mV/s, [C]=0.1 M.

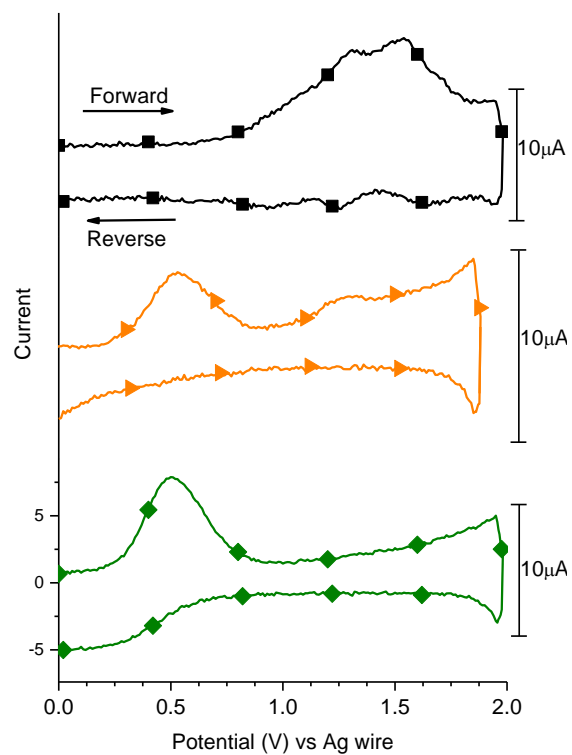

Figure S3. Square wave voltammograms of **1** (■), **3** (◆) and a mixture of **1** and **3** (▶) in degassed acetonitrile with 0.1 M TBAPF<sub>6</sub> as the electrolyte.

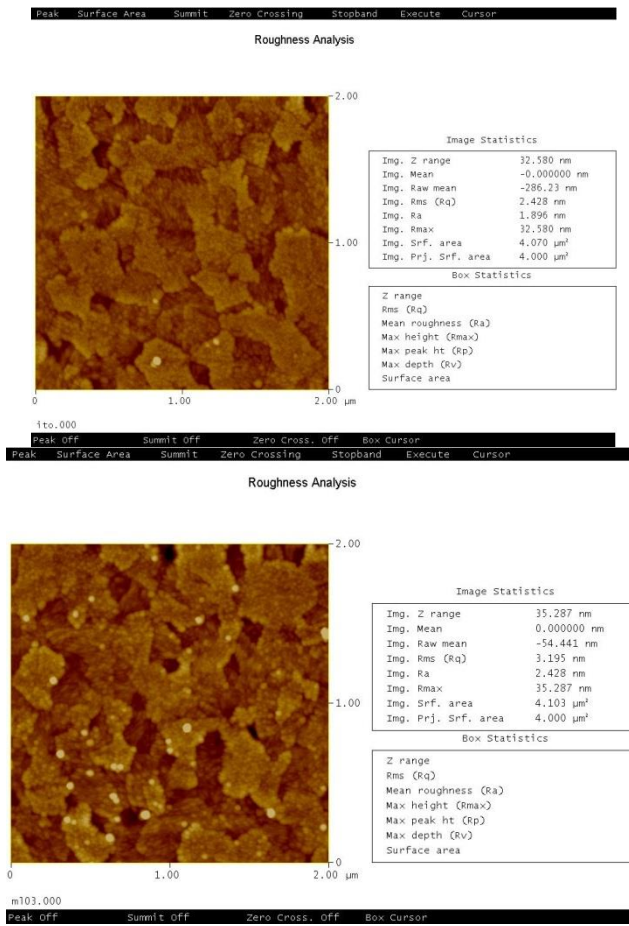

Figure S4. AFM micrograph illustrating the surface roughness of native ITO coated glass substrate (top) and **1s** (bottom).

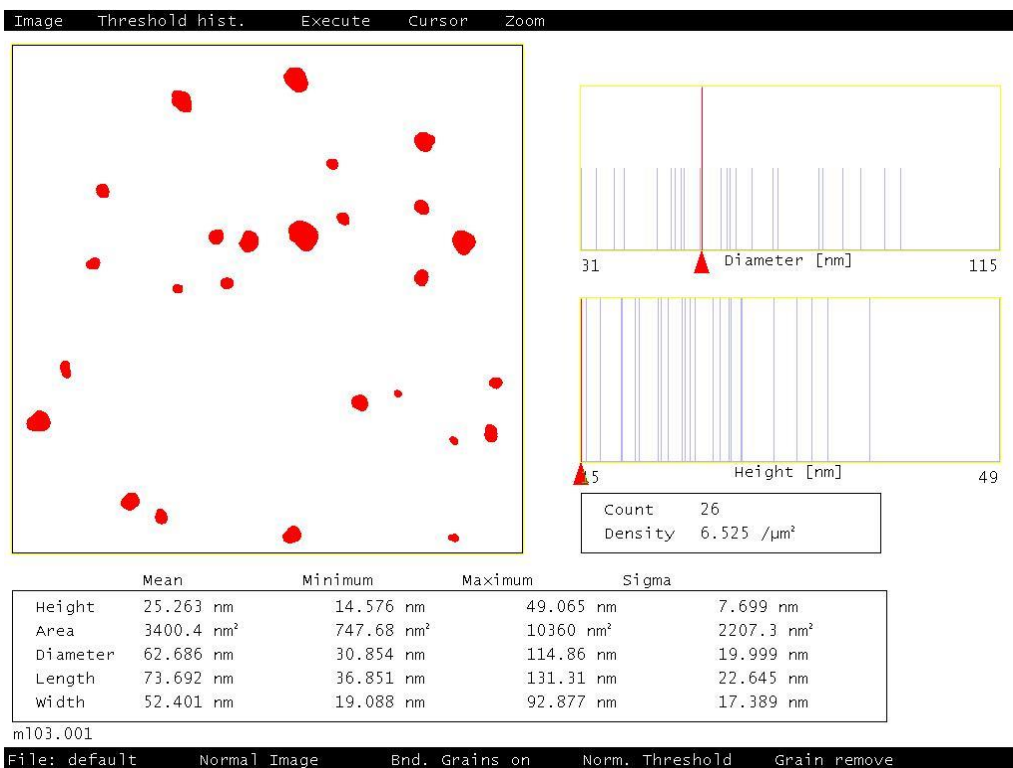

Figure S5. Particle size distribution of **1s** on an ITO coated glass substrate.

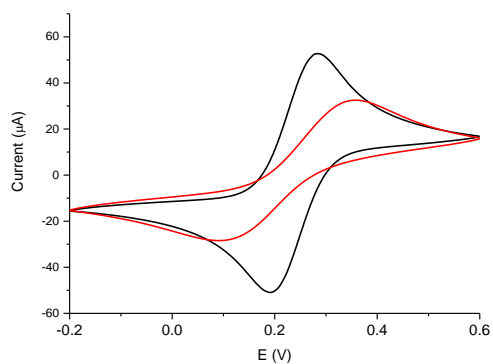

Figure S6. Cyclic voltammograms of a glassy carbon electrode before (black) and after immobilizing **4s** (red) in 5 mM solution of  $\text{K}_3[\text{Fe}(\text{CN})_6]$  and 5 mM  $\text{K}_4[\text{Fe}(\text{CN})_6]$  with 0.1 M KCl at pH=5 at 100 mV/s.

Table S1. ToF-SIMS data.

| Molecular formula   | Mass Center (u) | Compound                                                                          |                                                                                   |                                                                                     |                                                                                     |
|---------------------|-----------------|-----------------------------------------------------------------------------------|-----------------------------------------------------------------------------------|-------------------------------------------------------------------------------------|-------------------------------------------------------------------------------------|
|                     |                 | 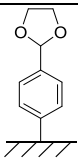 |  |  |  |
|                     |                 | Peak intensity                                                                    |                                                                                   |                                                                                     |                                                                                     |
| $C_9H_9O^-$         | 133.0664        | $1.5 \times 10^{-4}$                                                              | $7.9 \times 10^{-5}$                                                              |                                                                                     | $4.6 \times 10^{-5}$                                                                |
| $C_7H_5O^+$         | 105.0357        | $1.1 \times 10^{-3}$                                                              | $1.7 \times 10^{-3}$                                                              |                                                                                     | $3.8 \times 10^{-4}$                                                                |
| $C_7H_4^+$          | 88.0284         | $1.5 \times 10^{-4}$                                                              | $4.7 \times 10^{-4}$                                                              | $8.3 \times 10^{-4}$                                                                | $2.1 \times 10^{-4}$                                                                |
| $C_6H_4N^+$         | 90.0326         |                                                                                   |                                                                                   | $3.2 \times 10^{-4}$                                                                |                                                                                     |
| $C_6H_4N^-$         | 90.0328         |                                                                                   |                                                                                   | $8.5 \times 10^{-4}$                                                                |                                                                                     |
| $C_6H_5^+$          | 77.0384         |                                                                                   |                                                                                   | $7.6 \times 10^{-3}$                                                                |                                                                                     |
| $C_7H_6N^+$         | 104.0536        |                                                                                   |                                                                                   | $8.9 \times 10^{-4}$                                                                | $7.5 \times 10^{-4}$                                                                |
| $C_7H_7N^+$         | 105.0592        |                                                                                   |                                                                                   | $6.2 \times 10^{-4}$                                                                |                                                                                     |
| $C_7H_7^+$          | 91.0538         |                                                                                   |                                                                                   | $2.8 \times 10^{-3}$                                                                | $1.7 \times 10^{-3}$                                                                |
| $C_{10}H_9Fe^+$     | 184.9987        |                                                                                   |                                                                                   |                                                                                     | $6.7 \times 10^{-4}$                                                                |
| $C_{10}H_{10}Fe^+$  | 186.0093        |                                                                                   |                                                                                   |                                                                                     | $2.6 \times 10^{-3}$                                                                |
| $C_{10}H_{11}NFe^+$ | 201.0337        |                                                                                   |                                                                                   |                                                                                     | $4.8 \times 10^{-3}$                                                                |
| $C_{13}H_{10}N^+$   | 180.0837        |                                                                                   |                                                                                   | $2.6 \times 10^{-4}$                                                                |                                                                                     |
| $C_{17}H_{14}NFe^+$ | 288.0539        |                                                                                   |                                                                                   |                                                                                     | $4.9 \times 10^{-5}$                                                                |



Table S2. XPS data expressed in atomic percentages.

| Name    | BE (eV) | Assigned                         | ITO <sup>a</sup> | 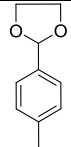 |  | 2s   | 1s <sup>b</sup> |                  | 3s <sup>c</sup> |                  | 1s→2s <sup>d</sup> |       | 1s→3s <sup>e</sup> |       |
|---------|---------|----------------------------------|------------------|-----------------------------------------------------------------------------------|-----------------------------------------------------------------------------------|------|-----------------|------------------|-----------------|------------------|--------------------|-------|--------------------|-------|
|         |         |                                  |                  | obs'd                                                                             | obs'd                                                                             |      | obs'd           | obs'd            | calc'd          | obs'd            | calc'd             | obs'd | calc'd             | obs'd |
| C1S     | 285.0   | C-C, C=C                         | 48.1             | 51.0                                                                              | 46.5                                                                              | 45.2 | 44.5            |                  | 33.3            |                  | 46.9               | 42.1  |                    |       |
|         | 285.6   | C-N                              |                  |                                                                                   |                                                                                   | 9.1  | 5.5             | 2.1              | 4.7             | 0.6              | 7.1                | 5.0   | 1.3                |       |
|         | 286.5   | C-O, C-O-C                       | 7.0              | 17.7                                                                              | 12.6                                                                              | 11.3 | 11.4            |                  | 10.2            |                  | 11.0               | 9.8   |                    |       |
|         | 287.9   | C=O, O-C-O                       |                  | 4.8                                                                               | 4.1                                                                               | 4.9  | 3.9             |                  | 6.3             |                  | 5.0                | 4.9   |                    |       |
|         | 289.2   | O-C=O                            | 4.0              | 2.5                                                                               | 5.0                                                                               | 2.0  | 3.9             |                  | 3.9             |                  | 2.5                | 4.1   |                    |       |
|         | 291.2   | $\pi \Rightarrow \pi^*$ from C=C |                  |                                                                                   | 0.6                                                                               | 0.9  | 7.5             | 0.7              |                 |                  |                    | 0.8   |                    |       |
| N1S     | 399.5   | C-N, C=N, N=N                    |                  | 1.2                                                                               | 0.7                                                                               | 4.0  | 1.3             | 2.4              | 1.0             | 1.2              | 3.1                | 0.8   | 1.6                |       |
|         | 402.6   | N+                               |                  | 1.1                                                                               | 0.3                                                                               | 2.0  |                 |                  | 0.5             |                  | 1.1                | 1.0   |                    |       |
|         | 406.3   | NO <sub>2</sub>                  |                  |                                                                                   |                                                                                   |      | 0.7             | ref <sup>f</sup> |                 |                  |                    | 0.4   | ref <sup>f,g</sup> |       |
| O1S     | 530.5   | In-O, Sn-O                       | 21.0             | 1.9                                                                               | 2.1                                                                               | 2.6  | 1.4             |                  | 1.9             |                  | 1.4                |       |                    |       |
|         | 531.9   | C=O, In-OH, Sn-OH                | 14.4             | 6.9                                                                               | 9.0                                                                               | 5.2  | 7.8             |                  | 10.5            |                  | 5.7                | 11.7  |                    |       |
|         | 532.9   | C-O, C-O-C                       |                  | 8.8                                                                               | 12.5                                                                              | 10.9 | 11.7            |                  | 9.7             |                  | 11.5               | 9.4   |                    |       |
|         | 533.3   | C-O                              | 5.5              |                                                                                   |                                                                                   |      |                 |                  |                 |                  |                    |       |                    |       |
|         | 533.8   | O-C=O, NO <sub>2</sub>           |                  | 2.2                                                                               | 4.9                                                                               | 2.0  | 5.5             | 1.4              | 3.7             |                  | 2.6                | 3.8   | 0.8                |       |
| Fe2p3/2 | 708.0   | ferrocene                        |                  |                                                                                   |                                                                                   |      |                 |                  | 0.6             | ref <sup>f</sup> |                    | 0.1   | ref <sup>f</sup>   |       |
|         | 710.3   | Iron oxide                       |                  |                                                                                   |                                                                                   |      |                 |                  | 2.0             |                  |                    | 0.7   |                    |       |

obs'd=observed; calc'd=calculated. ITO substrate cleaned by successive sonications in acetone, ethanol, and water, followed by air drying. <sup>b</sup> Average of two different samples. <sup>c</sup> Average of three different samples. <sup>d</sup> Exchanged by submerging the substrate in aniline with catalytic *p*TSOH overnight. <sup>e</sup> Exchanged by submerging the substrate in dichloromethane solution of aminoferrocene overnight. <sup>f</sup> Used as the reference to calculate the expected atomic percentages. <sup>g</sup> The reference takes into account 2xNO<sub>2</sub> per 1s.

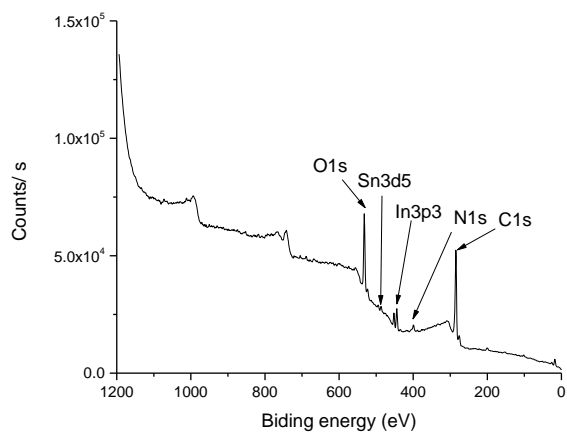

Figure S7. XPS survey spectrum of **4s**.

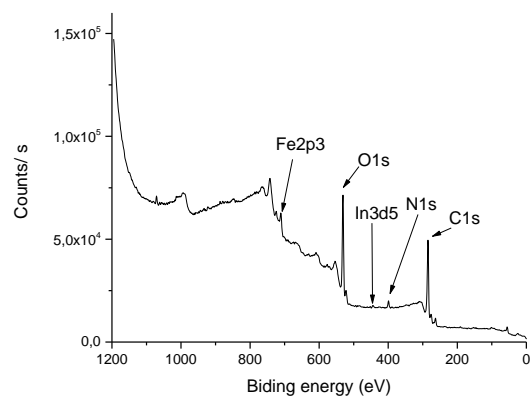

Figure S8. XPS survey spectrum of **3s**.

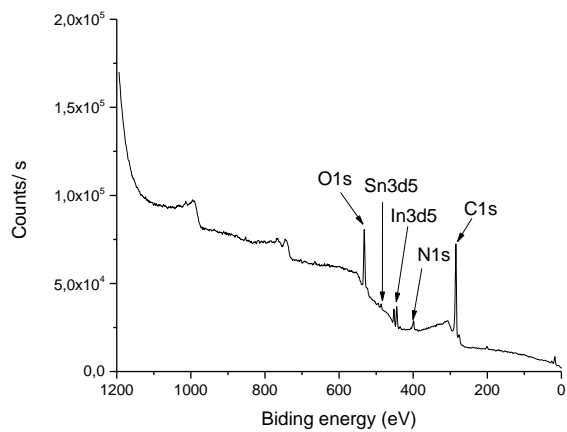

Figure S9. XPS survey spectrum of **2s** prepared by component exchange of **1s**.

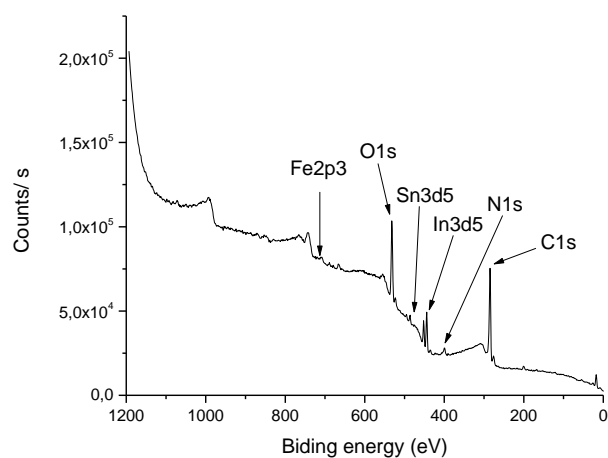

Figure S10. XPS survey spectrum of **3s** prepared by component exchange of **1s**.

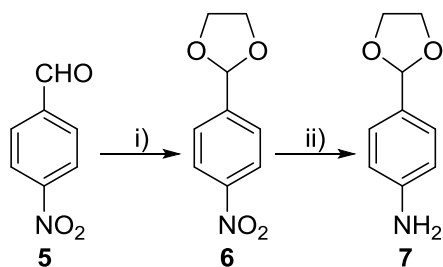

Figure S11. Synthetic scheme for the preparation of the reactive intermediate leading to **4s**: i) ethylene glycol, *p*-toluene sulfonic acid, anhydrous toluene, 120°C, overnight, and ii) PtO<sub>2</sub>, MgSO<sub>4</sub>, THF/EtOH, H<sub>2</sub> 70 psi.

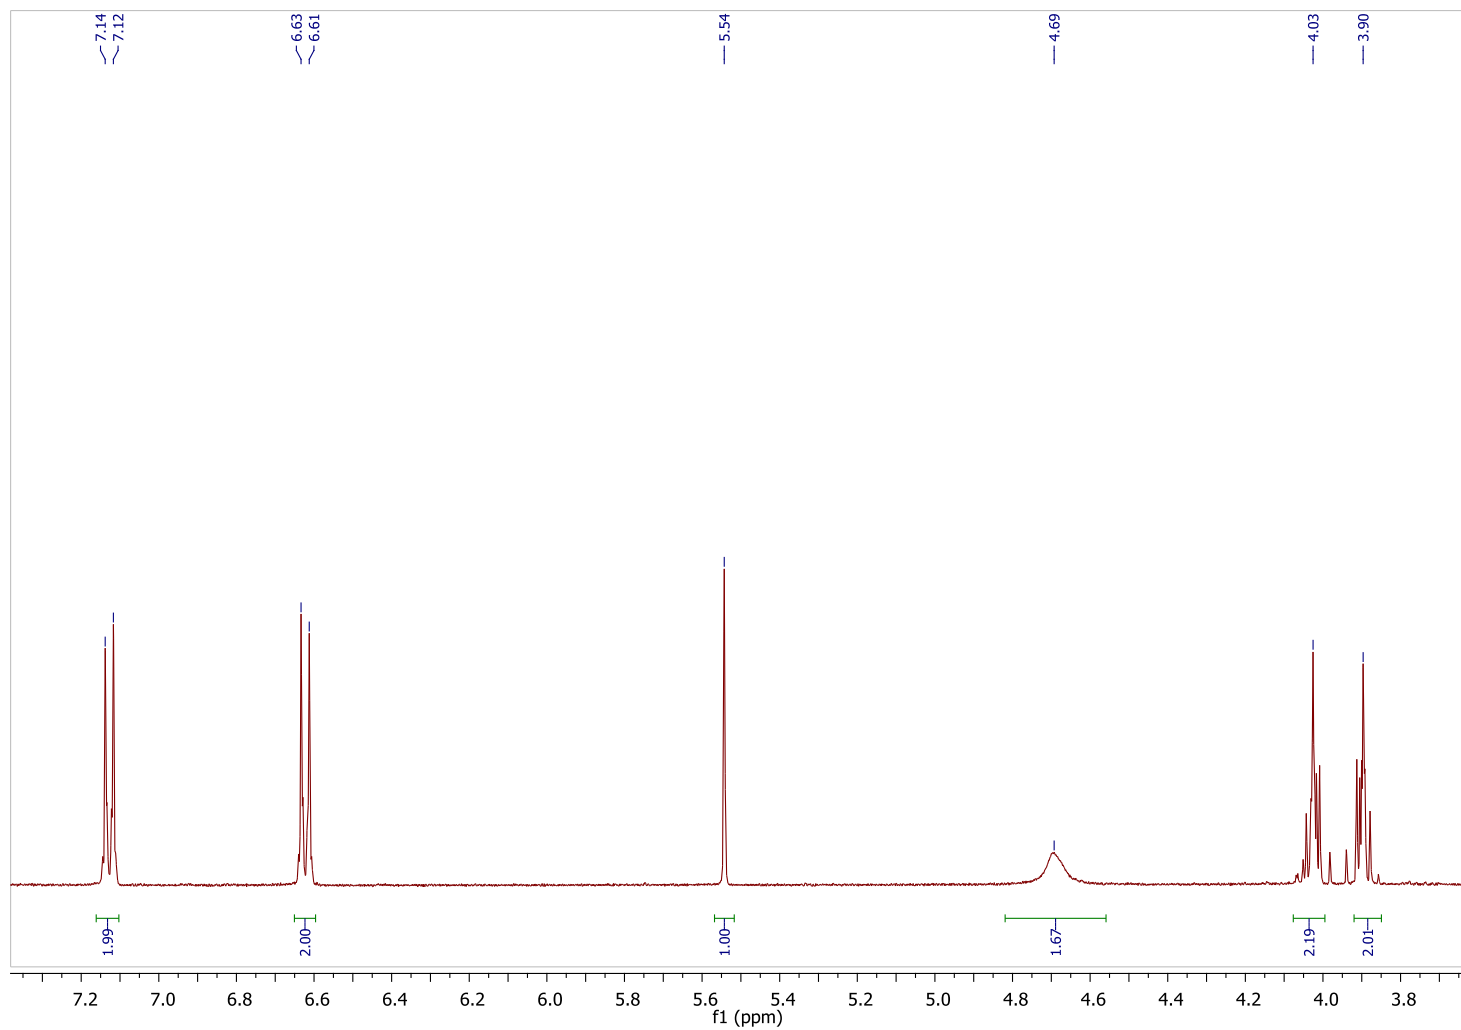

Figure S12. <sup>1</sup>H-NMR spectrum of 1,3-dioxolane-4-benzenamine (**7**) recorded in acetone-d<sub>6</sub>.

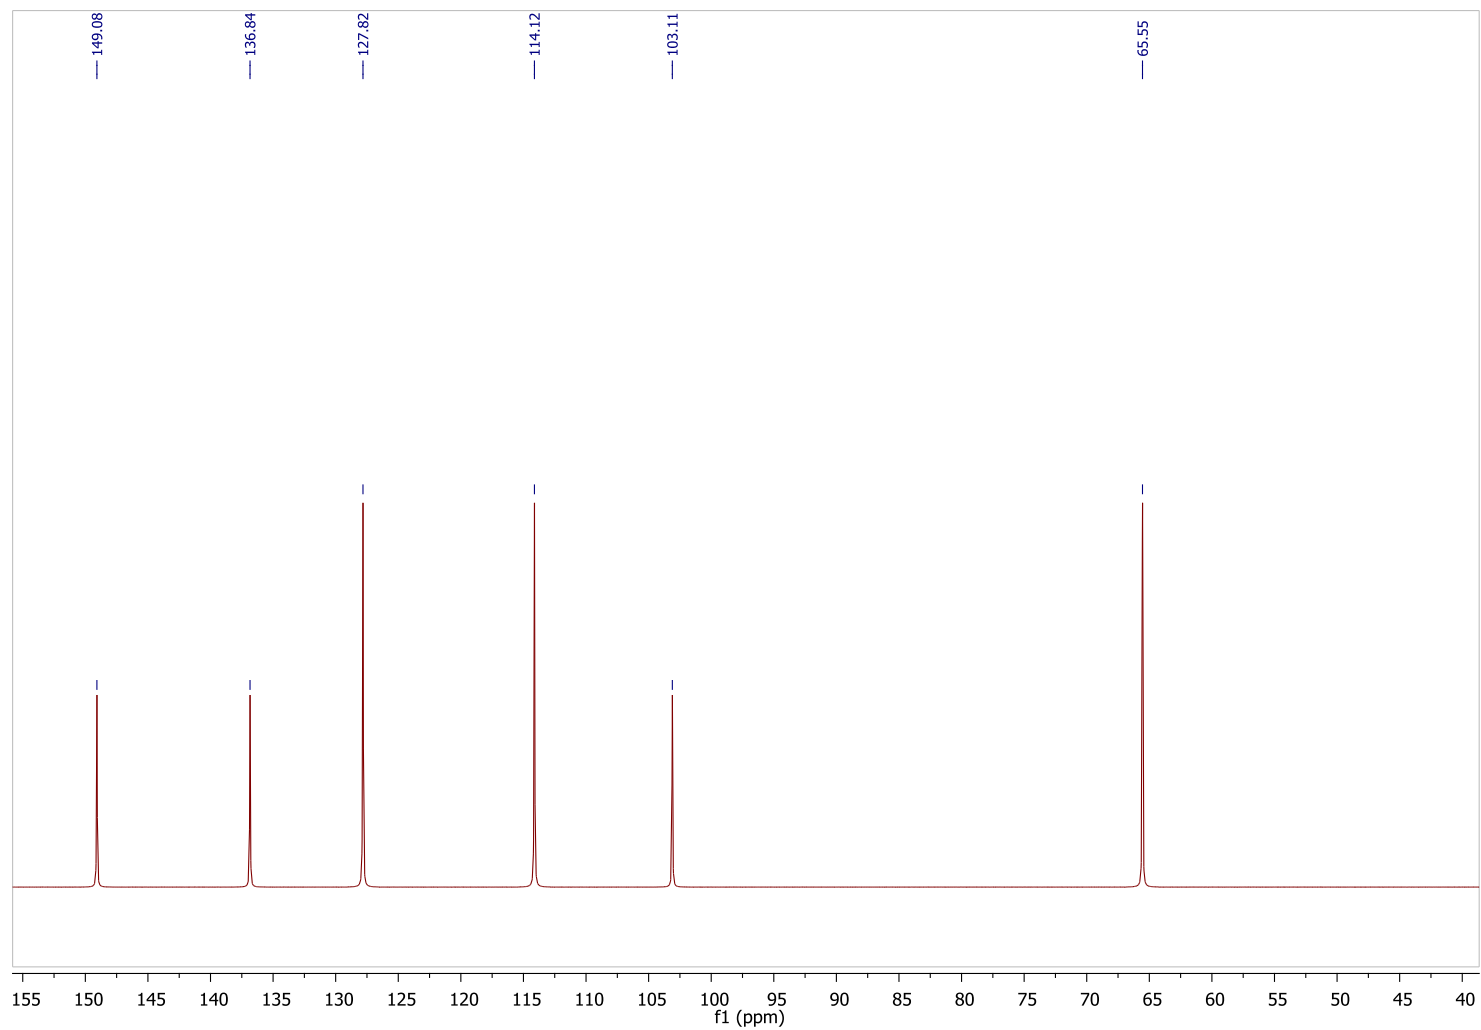

Figure S13.  $^{13}\text{C}$ -NMR spectrum of 1,3-dioxolane-4-benzenamine (**7**) recorded in acetone- $\text{d}_6$ .

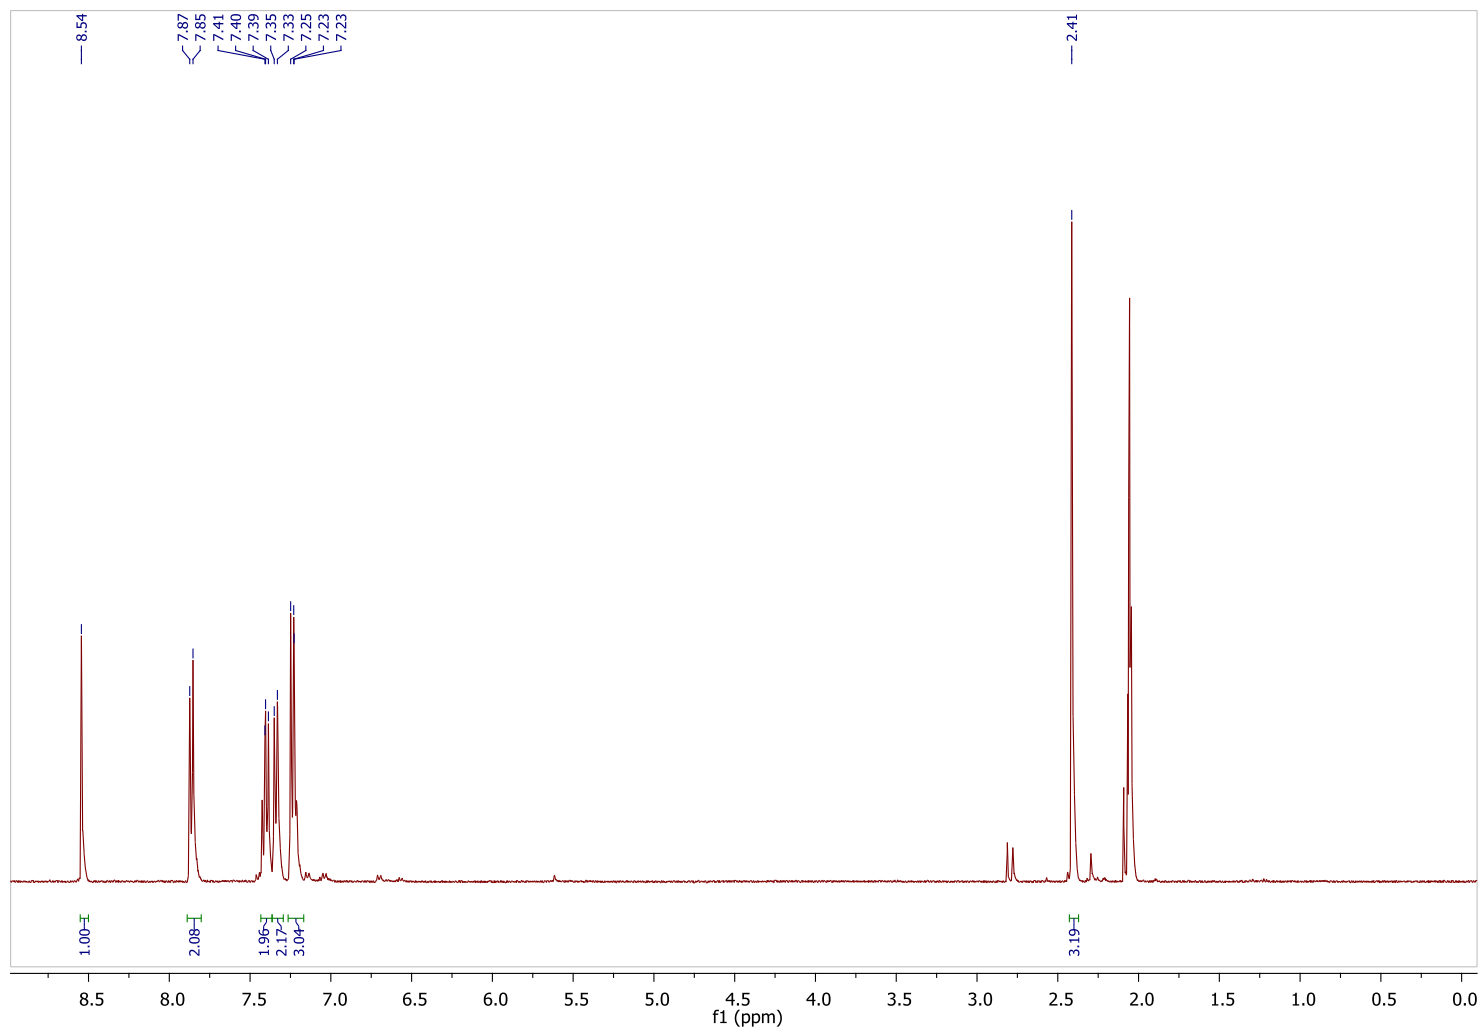

Figure S14. <sup>1</sup>H-NMR spectrum of *N*-phenyl-1-(*p*-tolyl)methanimine (**2**) recorded in acetone-d<sub>6</sub>.

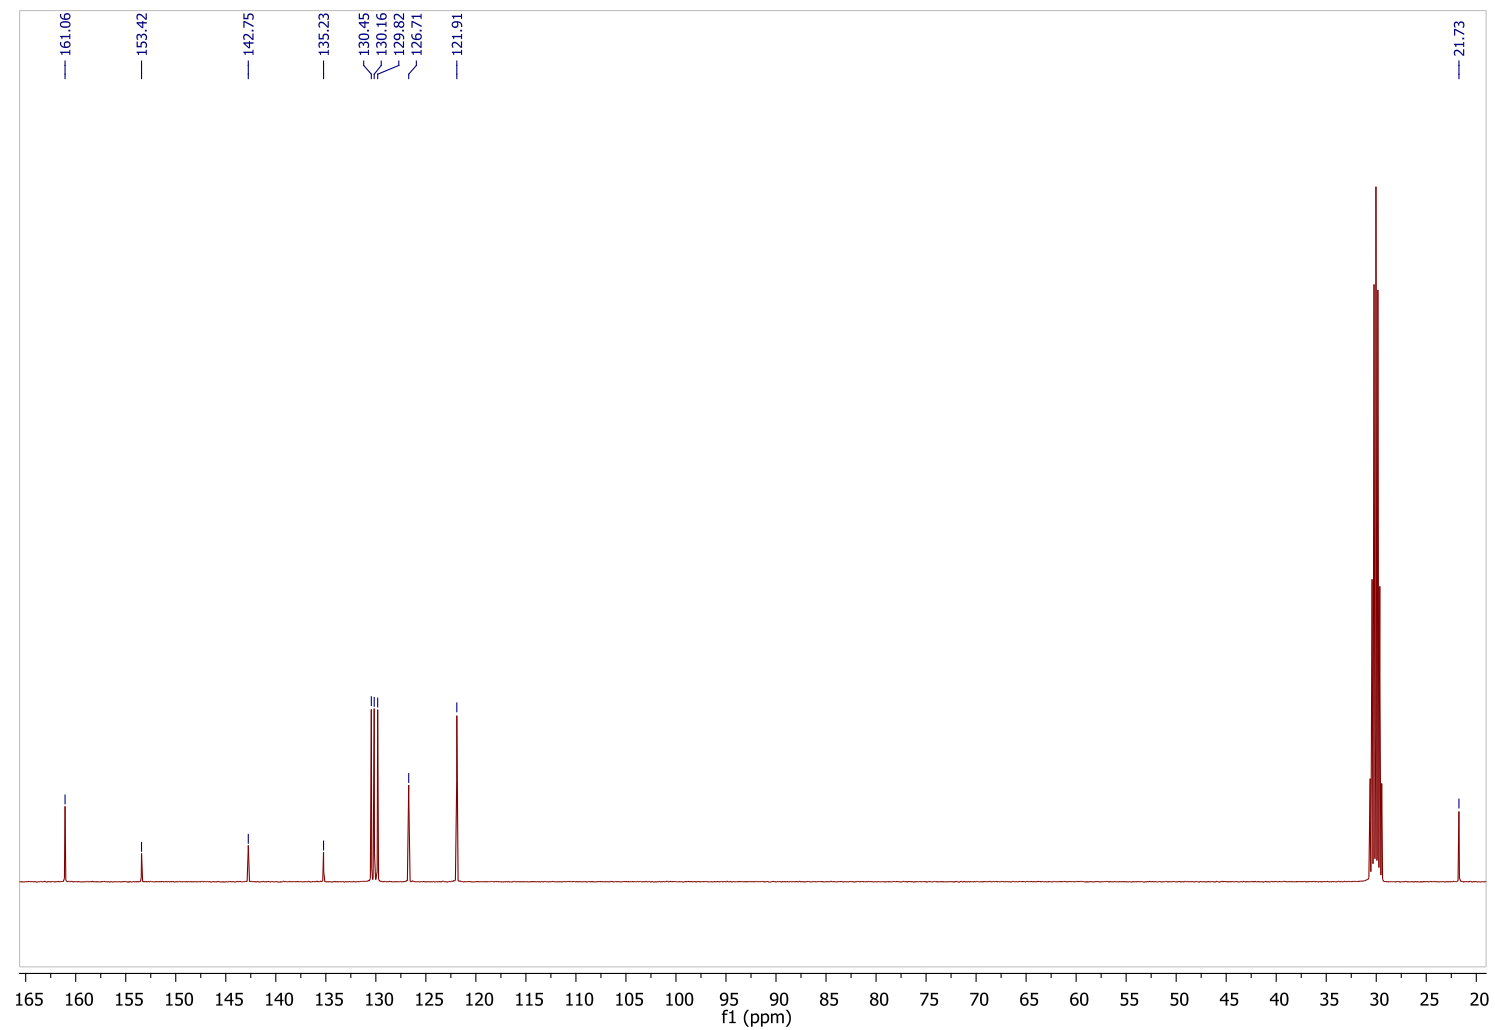

Figure S15.  $^{13}\text{C}$ -NMR spectrum of *N*-phenyl-1-(*p*-tolyl)methanimine (**2**) recorded in acetone- $\text{d}_6$ .

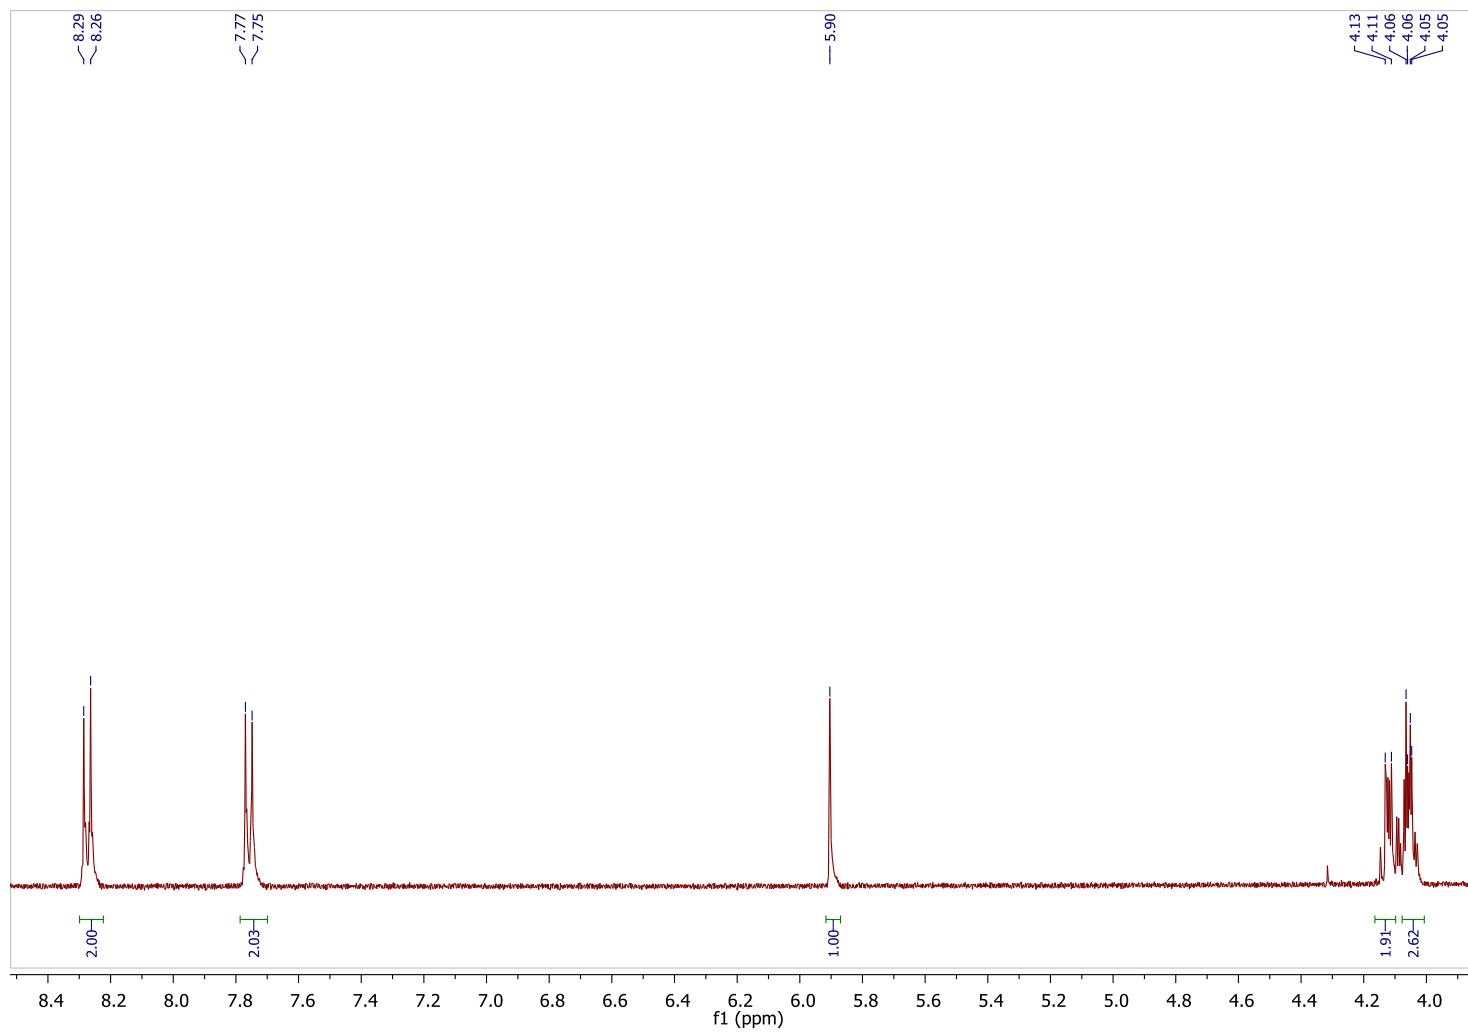

Figure S16.  $^1\text{H-NMR}$  spectrum of 1,3-dioxolane-4-nitrobenzaldehyde (**6**) recorded in acetone- $\text{d}_6$ .



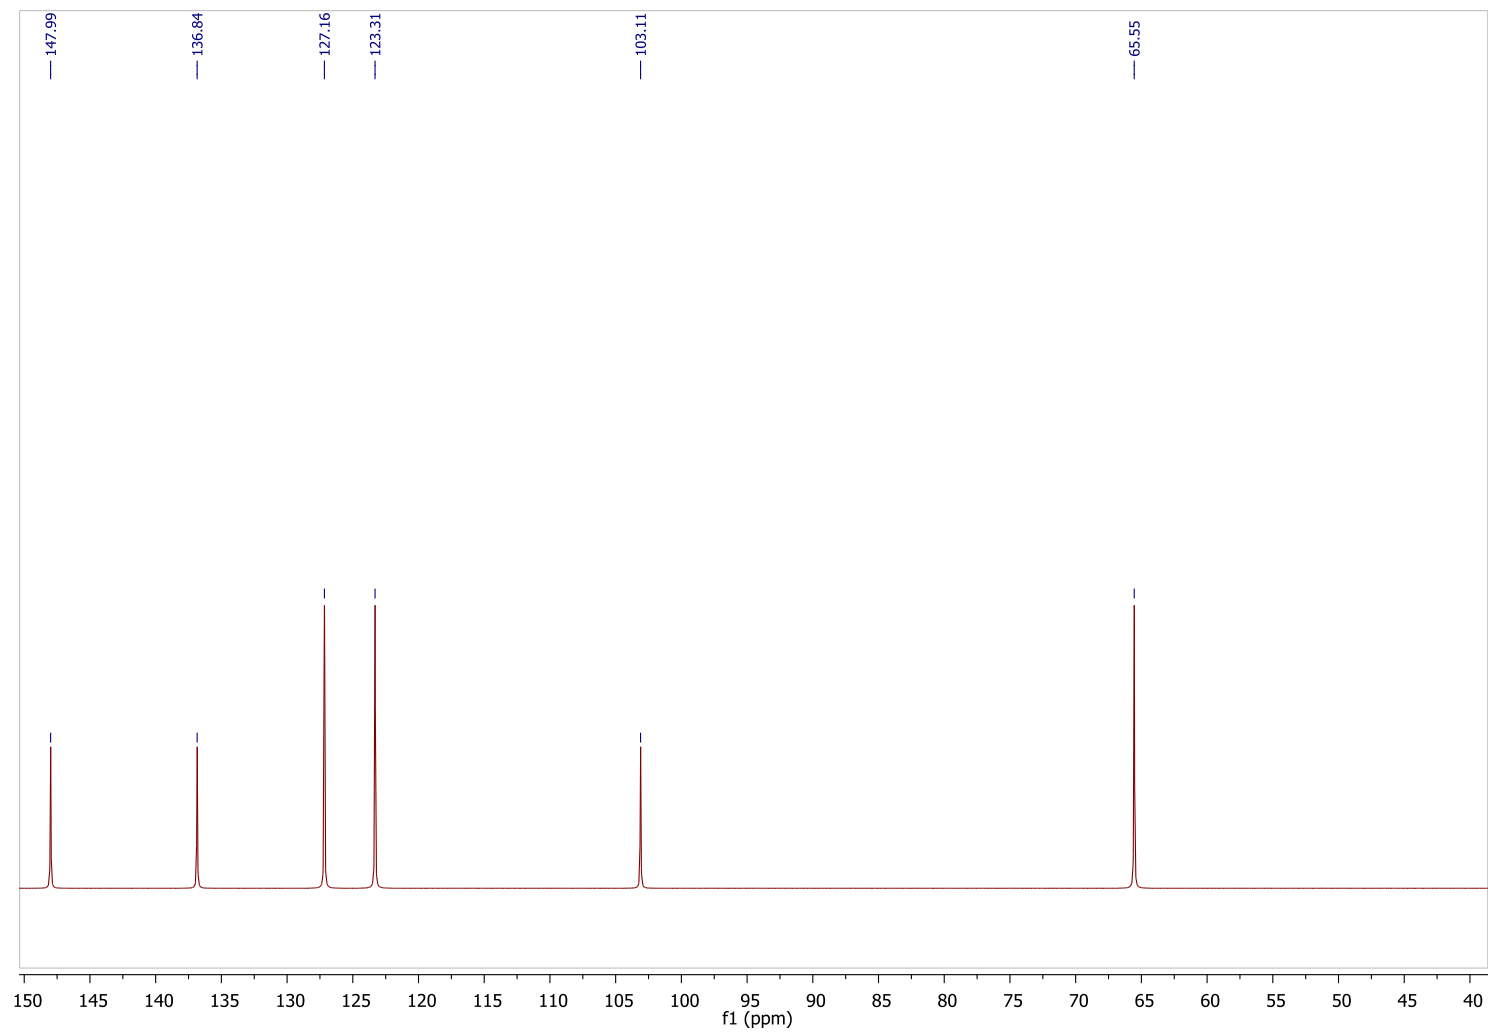

Figure S17.  $^{13}\text{C}$ -NMR spectrum of 1,3-dioxolane-4-nitrobenzaldehyde (**6**) recorded in acetone- $\text{d}_6$ .

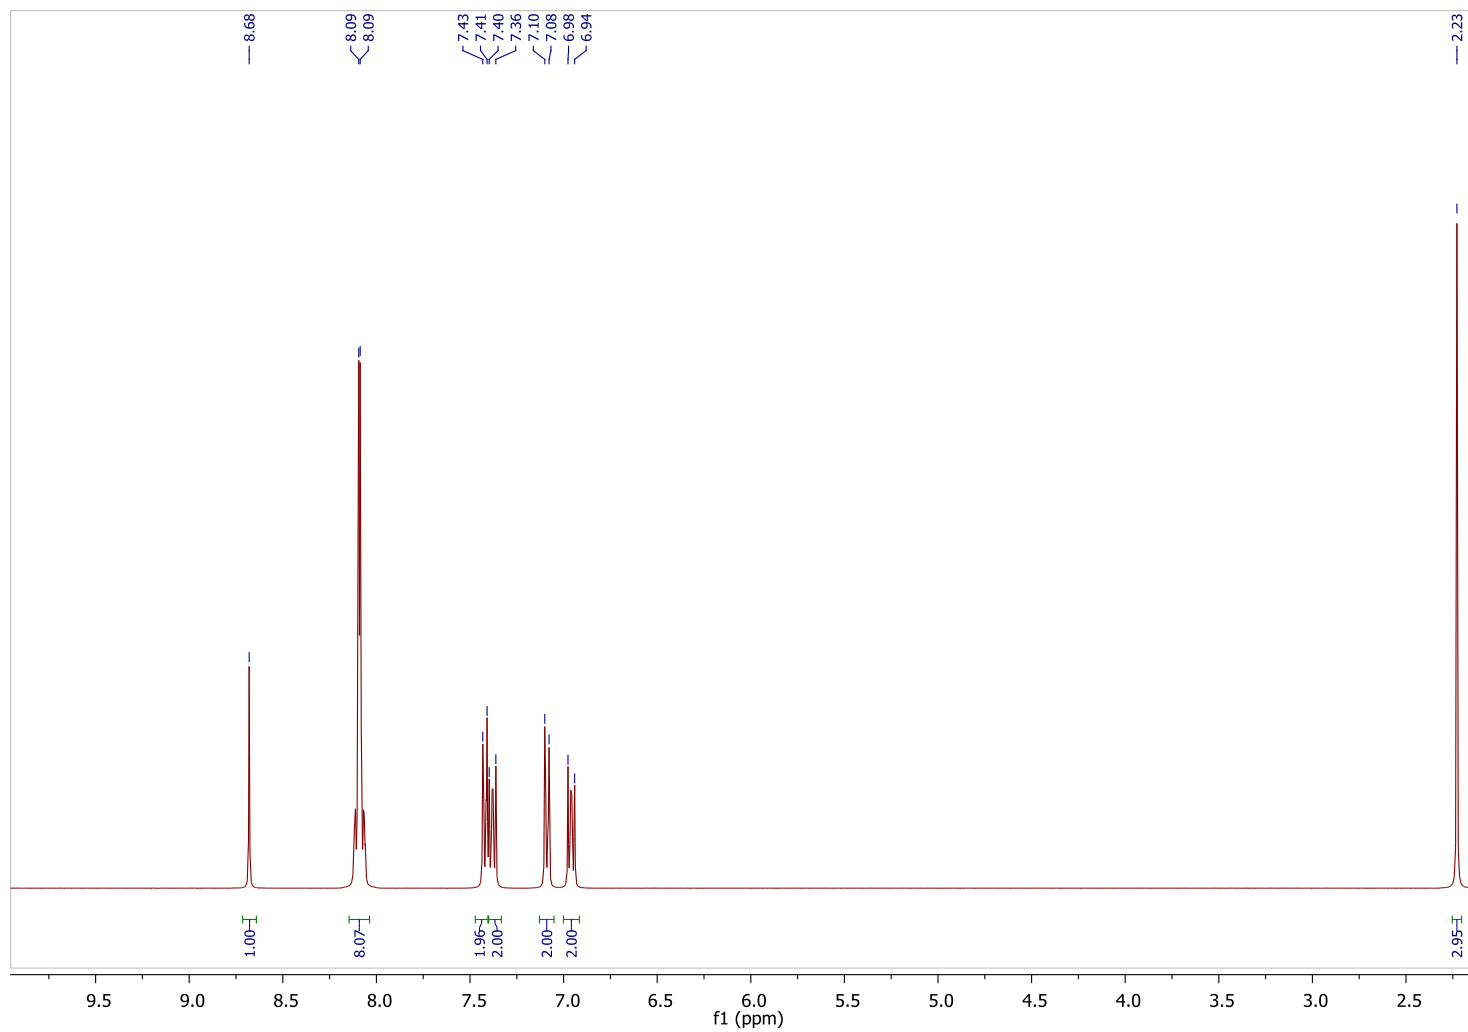

Figure S18.  $^1\text{H-NMR}$  spectrum of *N*-dinitrotriphenylamine-1-(*p*-tolyl)methanimine (**1**) recorded in acetone- $\text{d}_6$ .

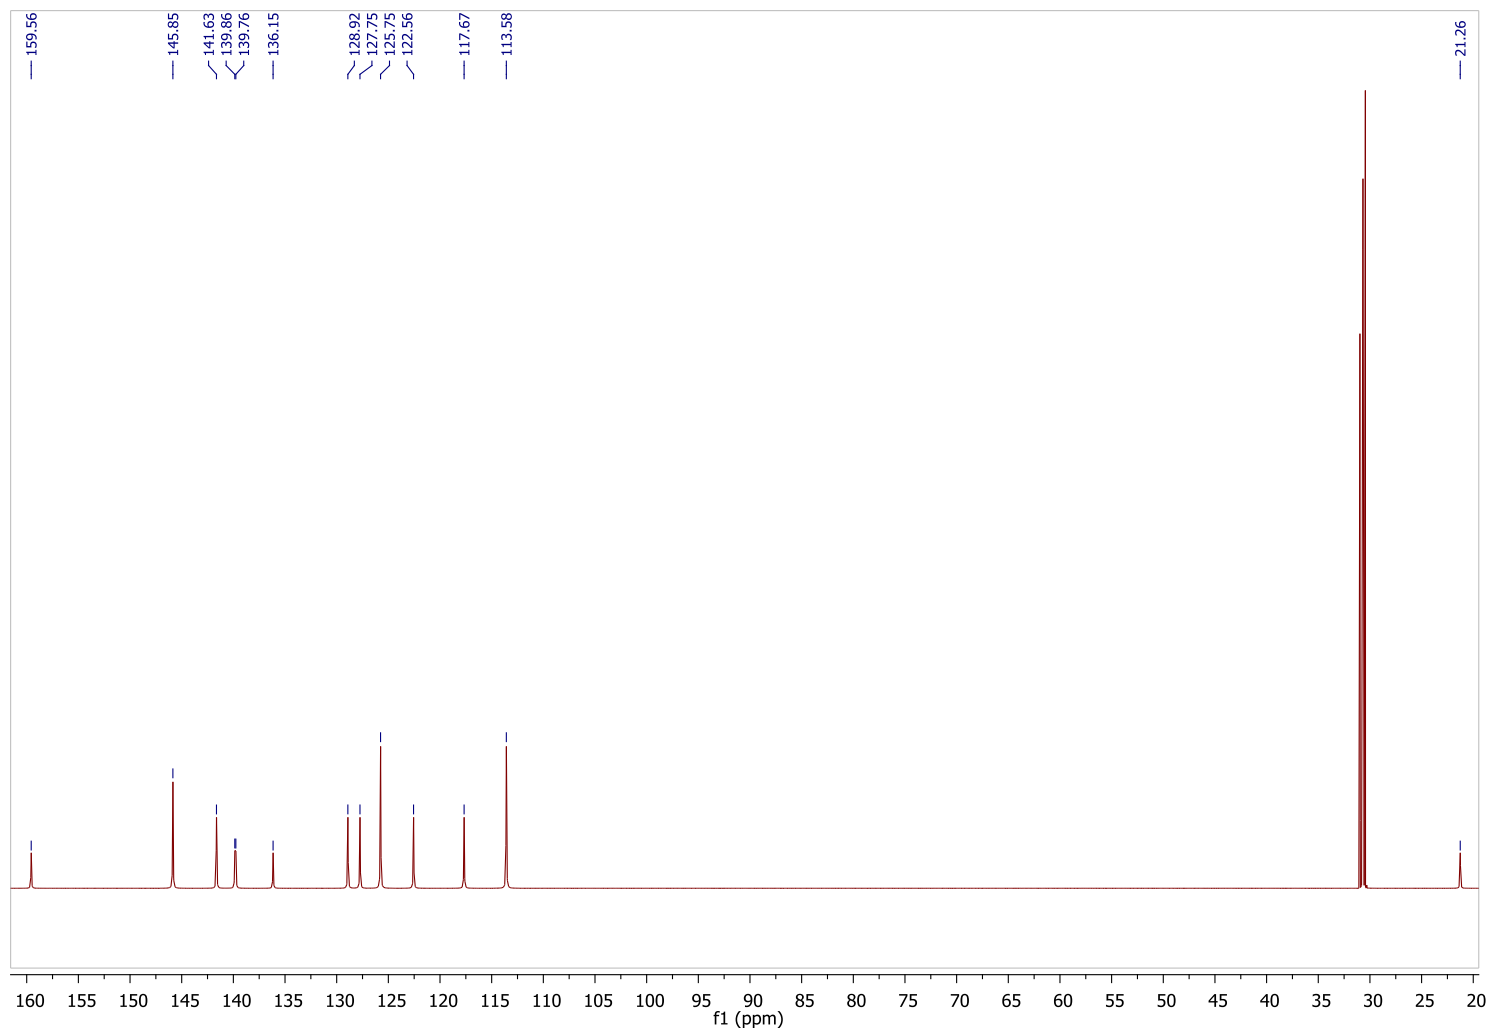

Figure S19.  $^{13}\text{C}$ -NMR spectrum of *N*-dinitrotriphenylamine-1-(*p*-tolyl)methanimine (**1**) recorded in acetone- $\text{d}_6$ .

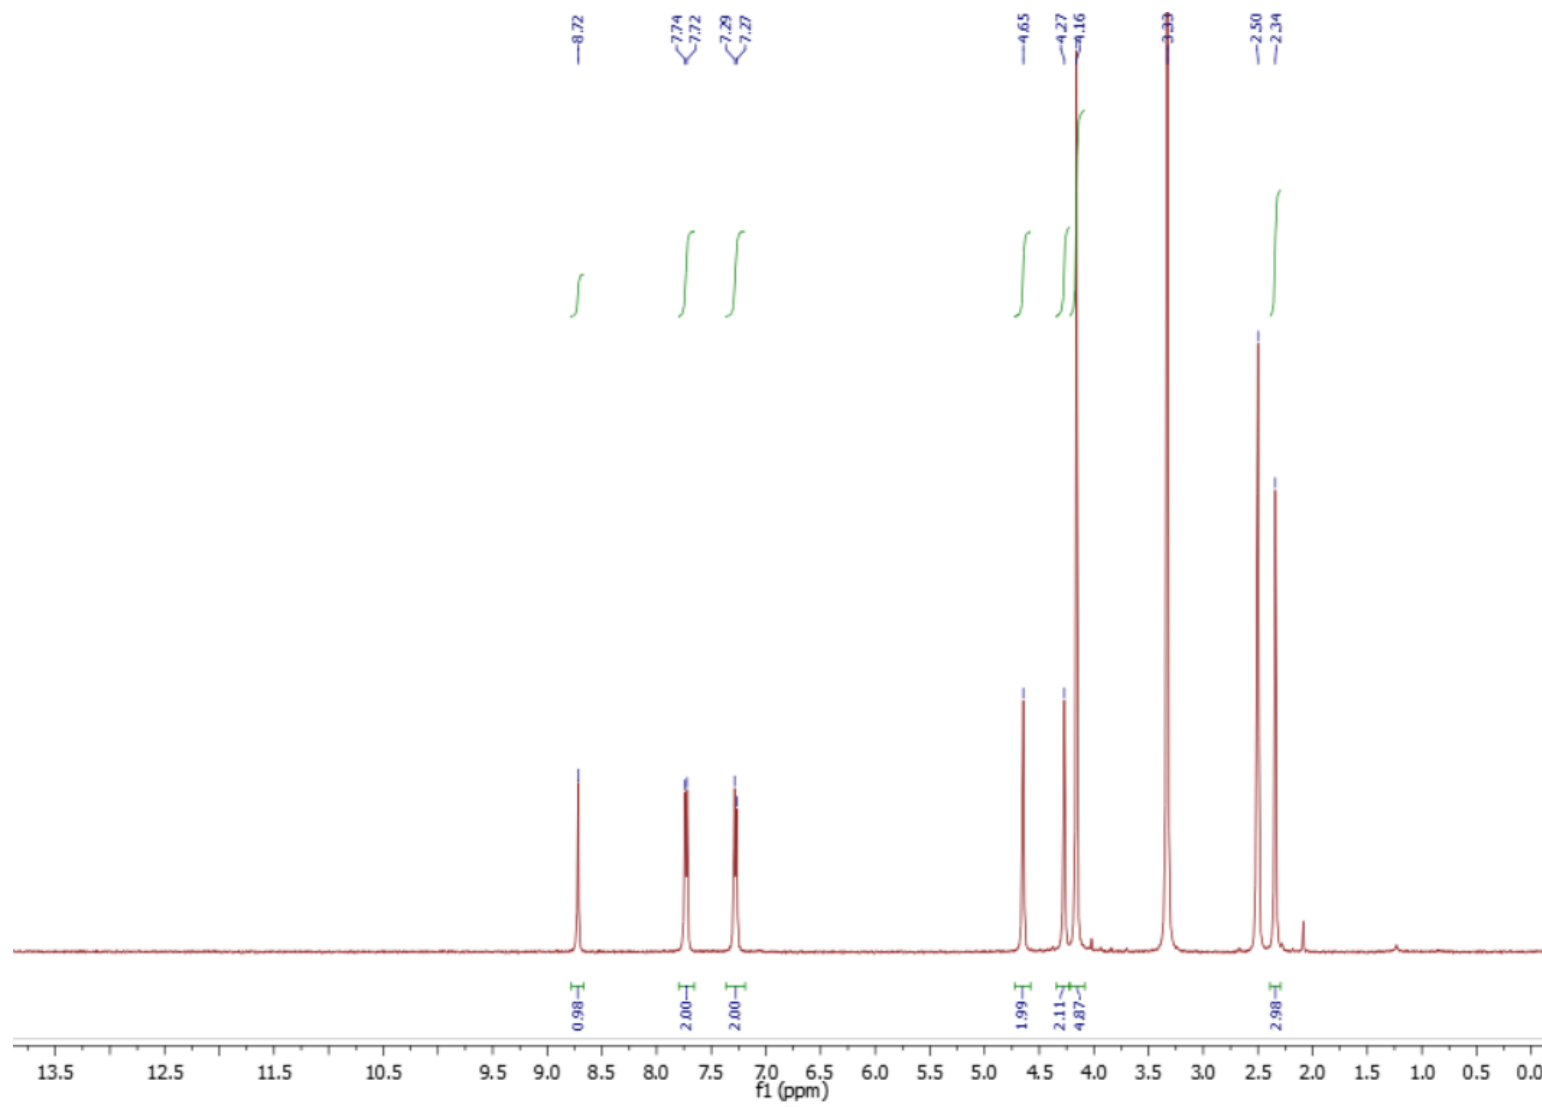

Figure S20.  $^1\text{H-NMR}$  spectrum of *N*-ferrocene-1-(*p*-tolyl)methanimine (**3**) recorded in acetone- $\text{d}_6$ .

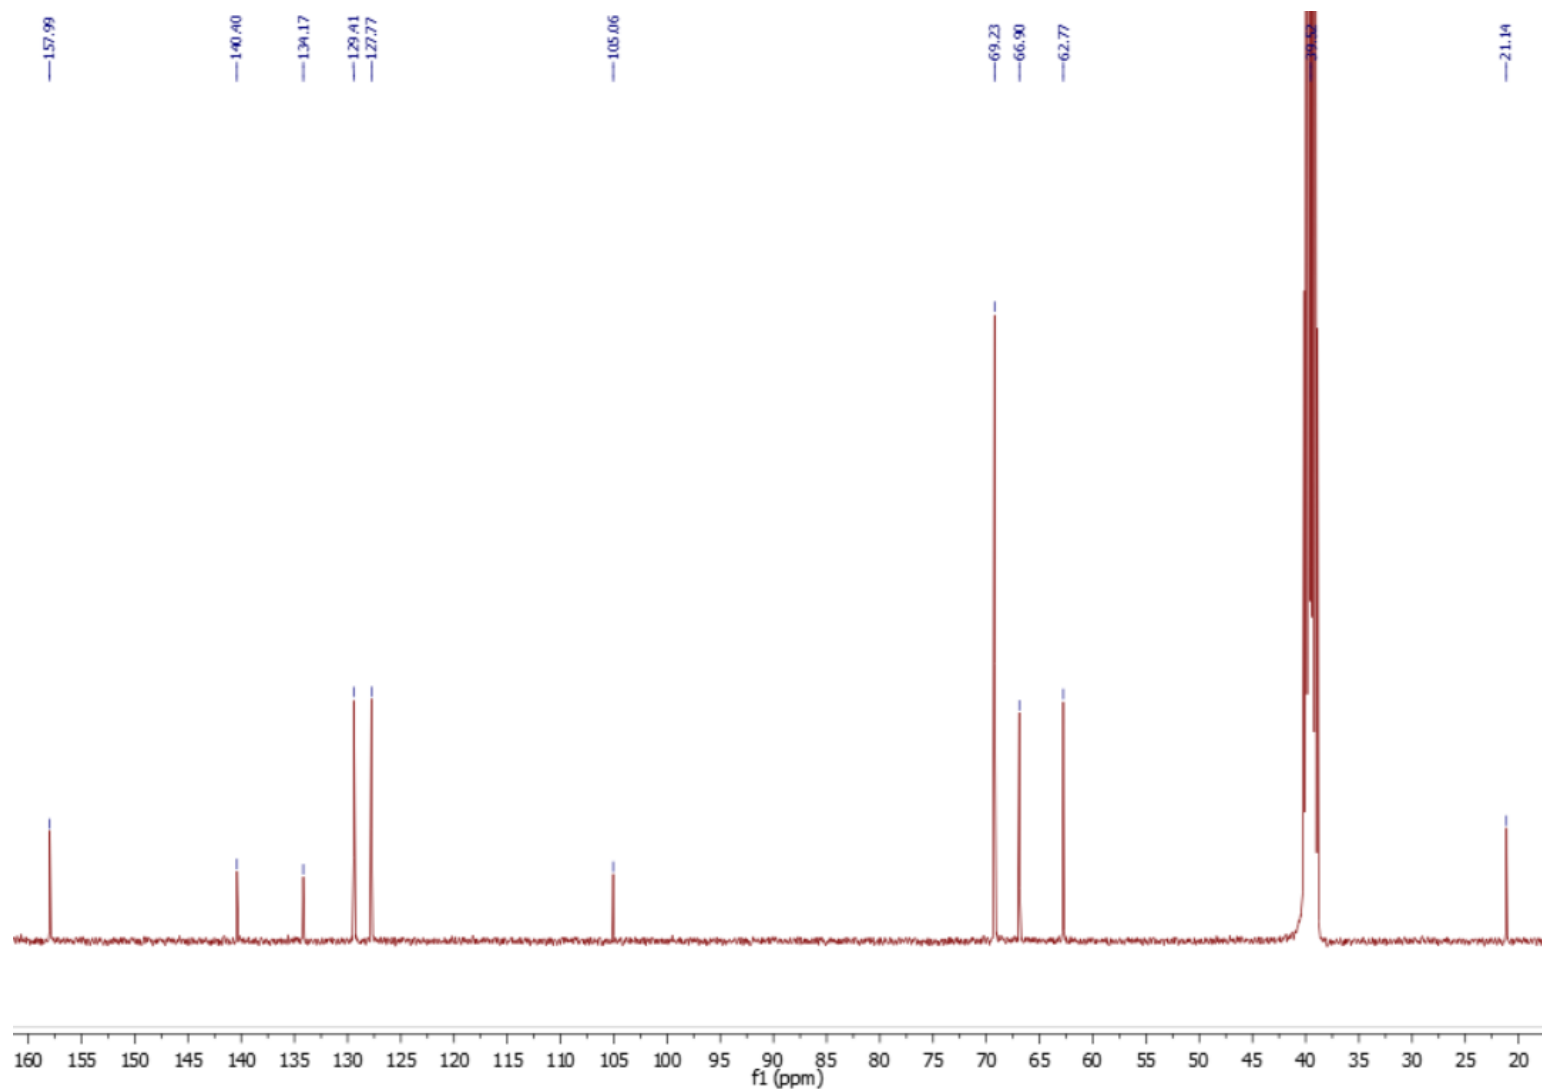

Figure S21.  $^{13}\text{C}$ -NMR spectrum of *N*-ferrocene-1-(*p*-tolyl)methanimine (**3**) recorded in acetone- $\text{d}_6$ .

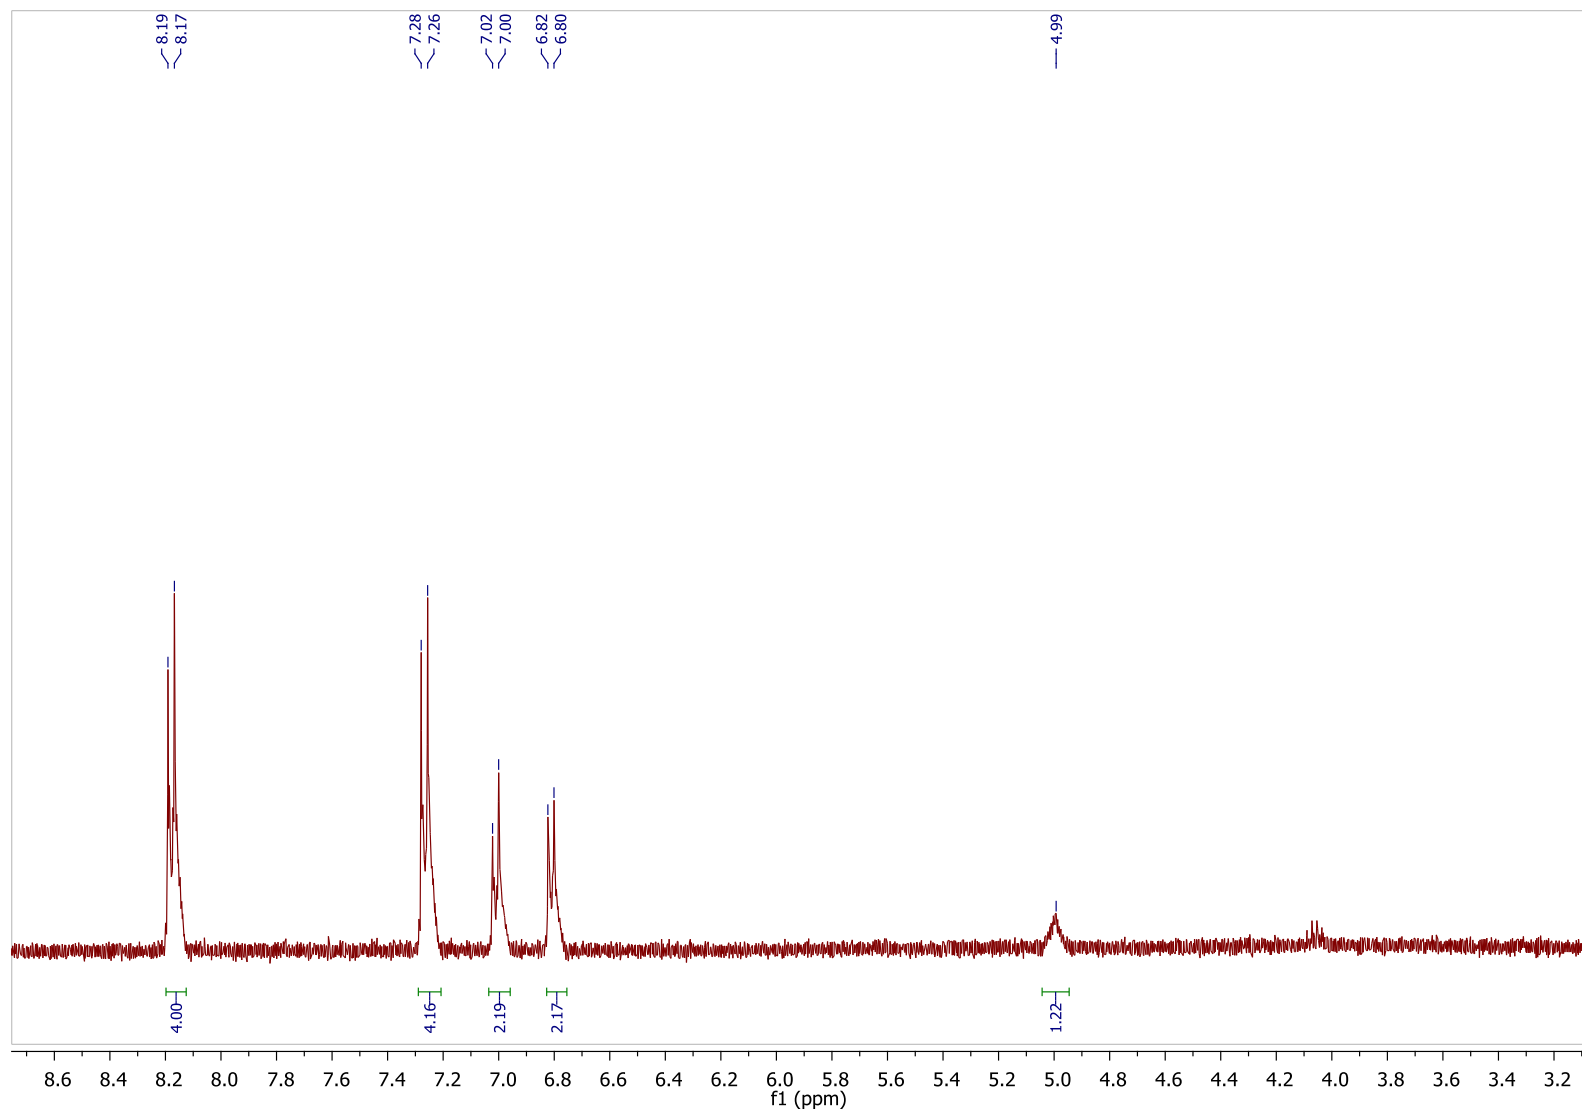

Figure S22.  $^1\text{H-NMR}$  spectrum of *N,N*-bis(4-nitrophenyl)-1,4-phenylenediamine recorded in acetone- $\text{d}_6$ .

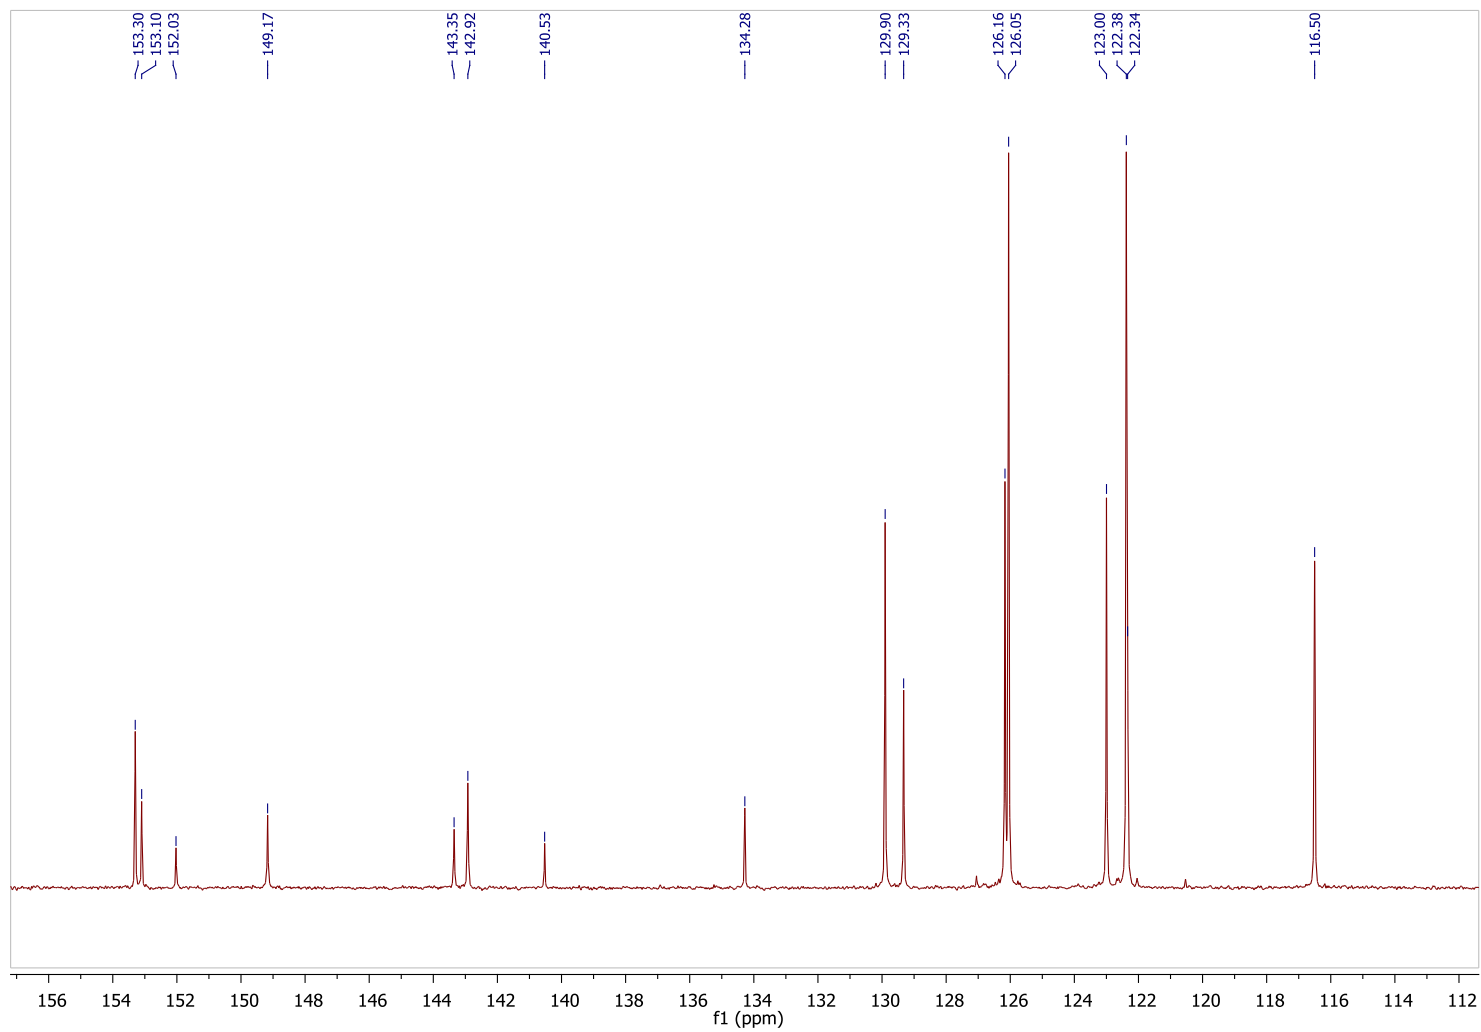

Figure S23.  $^{13}\text{C}$ -NMR spectrum of *N,N*-bis(4-nitrophenyl)-1,4-phenylenediamine recorded in acetone- $\text{d}_6$ .
